# Supplementary material for: SIRT3 deficiency-induced mitochondrial dysfunction and inflammasome formation in the brain
Source: PubMed Central journal article supplement (PMC6277395; doi:10.1038/s41598-018-35890-7), 2018-12-03

**SIRT3 deficiency-induced mitochondrial dysfunction and inflammasome formation  
in the brain**

Alpna Tyagi<sup>1,2</sup>, Christy Nguyen<sup>1</sup>, Thomas Chong<sup>1</sup>, Michel Cole<sup>3</sup>, Kristofer S Fritz<sup>3</sup>, Nichole Reisdorph<sup>3</sup>, Leslie  
Knaub<sup>1,2</sup>, Jane EB Reusch<sup>1,2</sup>, Subbiah Pugazhenti<sup>\*1,2</sup>

<sup>1</sup>Rocky Mountain Regional VA Medical Center

<sup>2</sup>Department of Medicine, <sup>3</sup>Department of Pharmaceutical Sciences  
University of Colorado-Anschutz Medical campus, Aurora, CO, USA

\*Address for correspondence:

Subbiah Pugazhenti, Ph.D.

Rocky Mountain Regional VA Medical Center and

Department of Medicine

University of Colorado; Anschutz Medical Campus

Aurora, CO USA

Phone: 720-857-5629;

Fax: 303-377-5686;

Email: [subbiah.pugazhenti@ucdenver.edu](mailto:subbiah.pugazhenti@ucdenver.edu)

**Running title:** Brain mitochondrial dysfunction in Sirt3<sup>-/-</sup> mice

**Key words:** Sirt3, western diet, protein lysine acetylation, acetylome analysis, mitochondrial dysfunction, inflammasome, microglia and neuroinflammation

Figure 2a. VDAC kDa

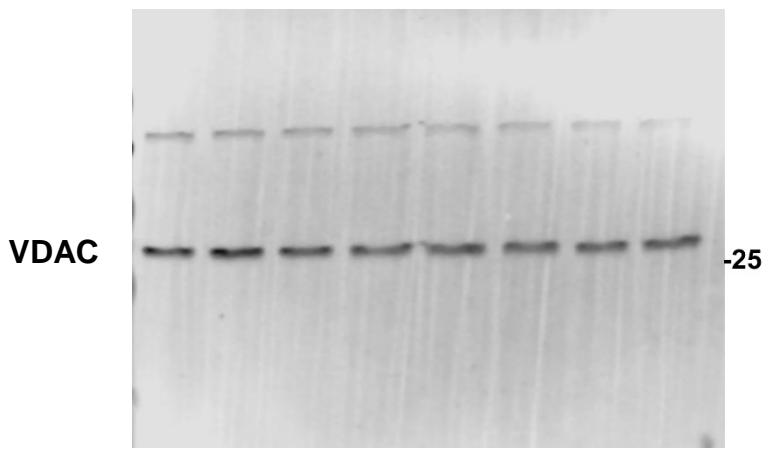

Figure 2c. SIRT1 kDa

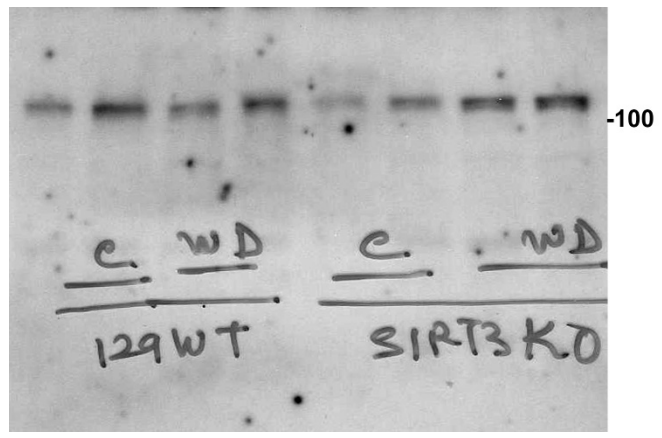

Figure 2c. SIRT3 kDa

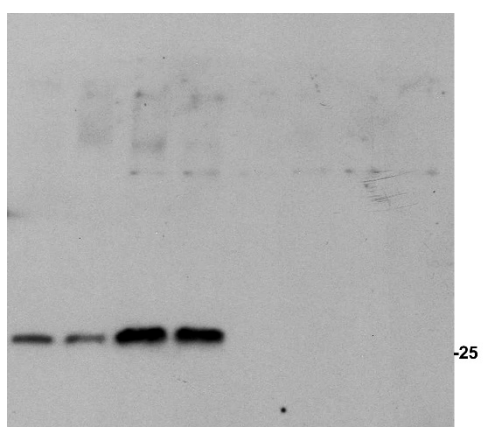

Figure 2c Ac-p65 kDa

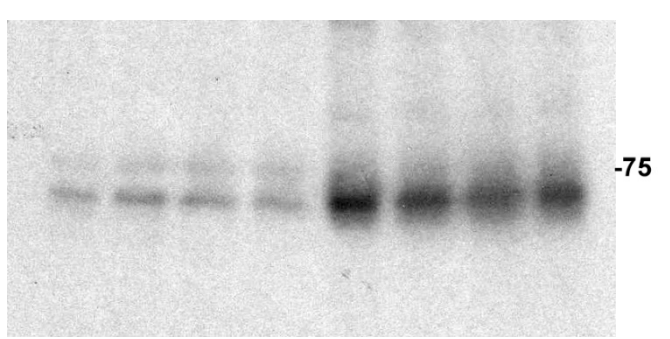

Figure 2c p65 kDa

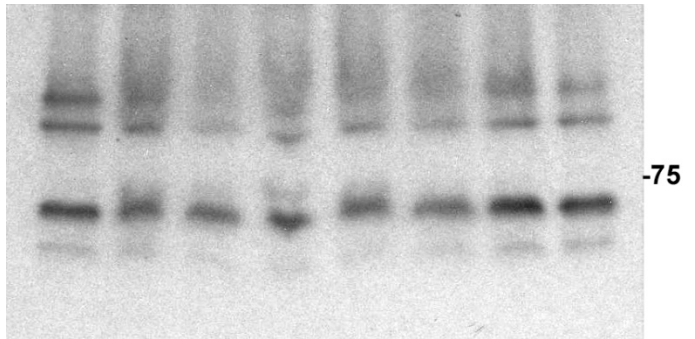

Figure 2c. SIRT5 kDa

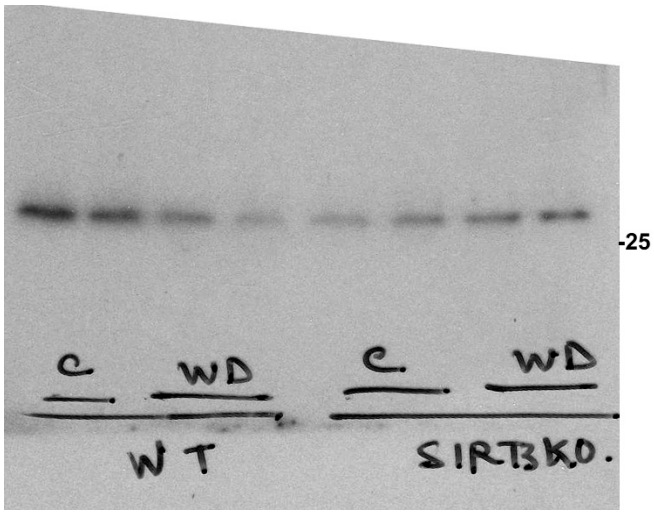

Figure 2c.  $\beta$  actin kDa

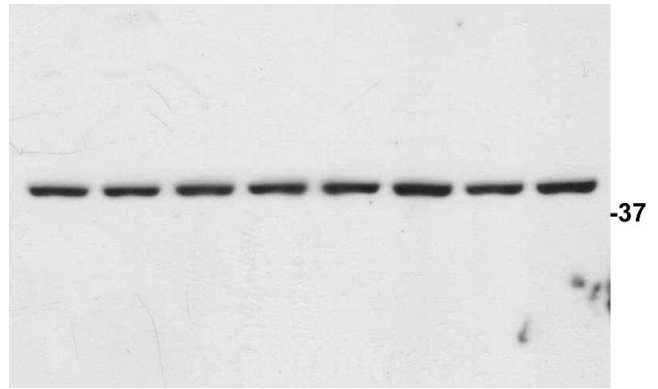

Figure 4a. Mfn1 kDa

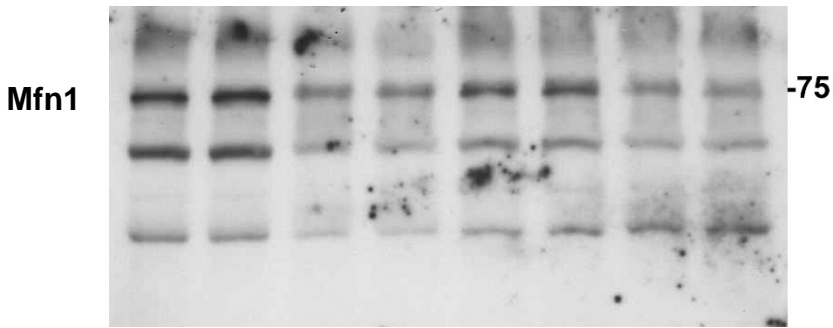

Figure 4a. Mfn2 kDa

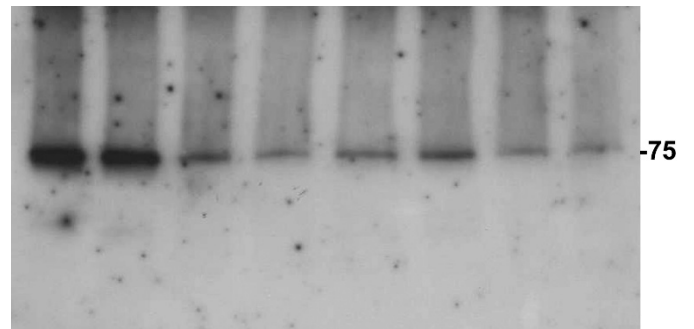

Figure 4a. Drp1 kDa

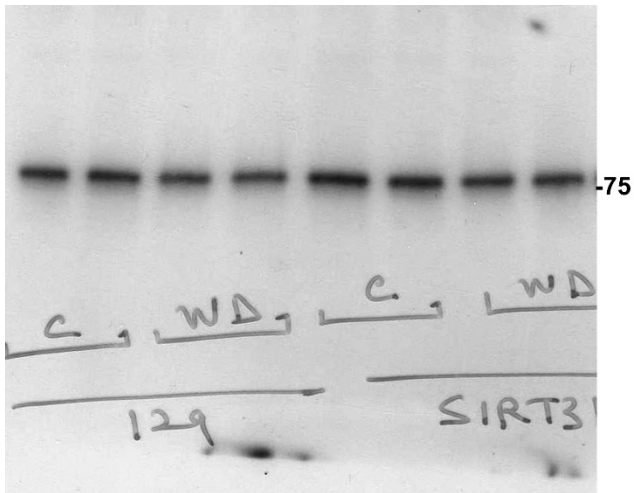

Figure 4a. Ac-SOD2 kDa

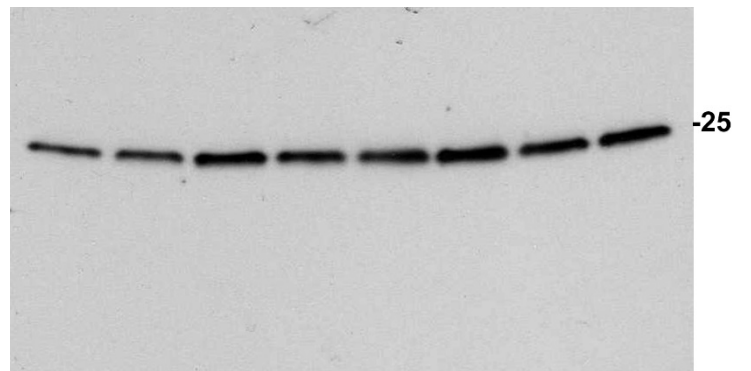

Figure 4a.

VDAC

kDa

VDAC

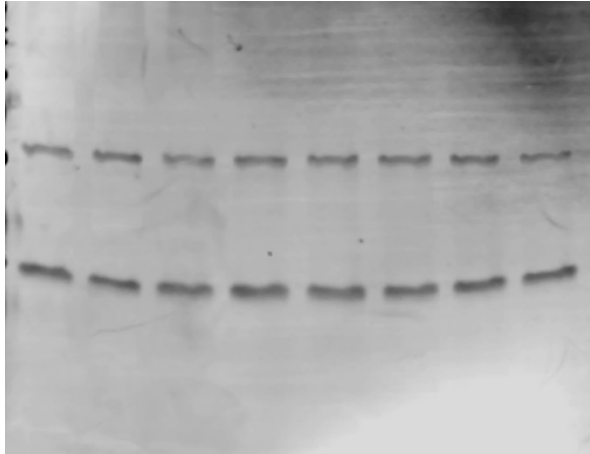

Figure 6a. Mito complex (Light exposure)

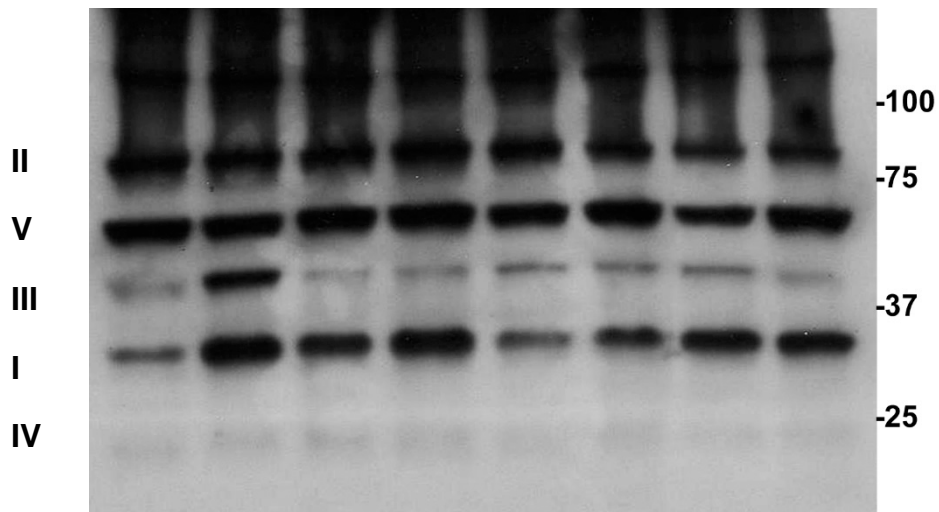

Figure 6a. Mito complex (Dark exposure)

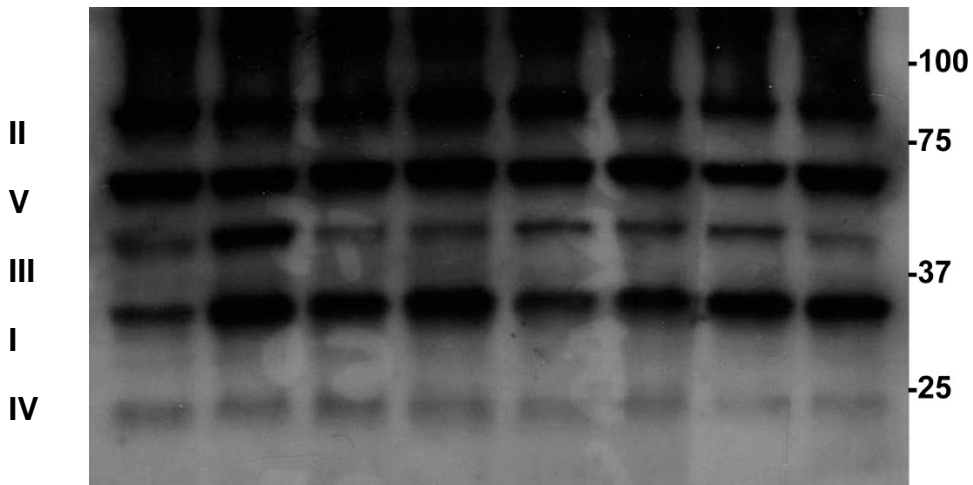

Figure 6a.

VDAC

kDa

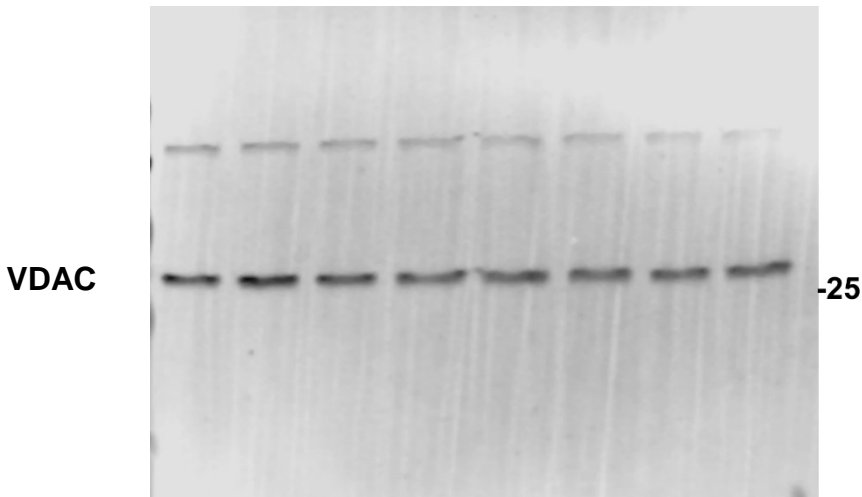

Figure 7a.  $\beta$  actin kDa

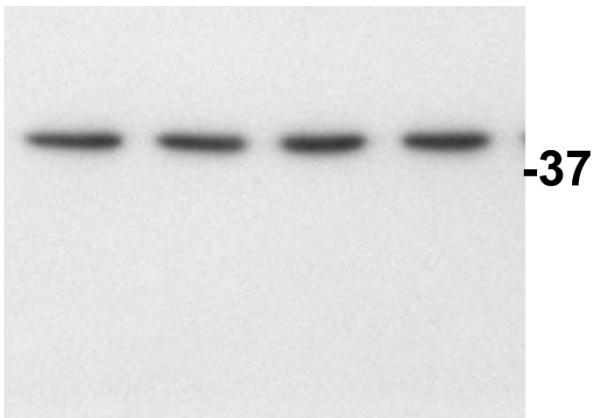

Figure 8d. I $\kappa$ B $\alpha$  kDa

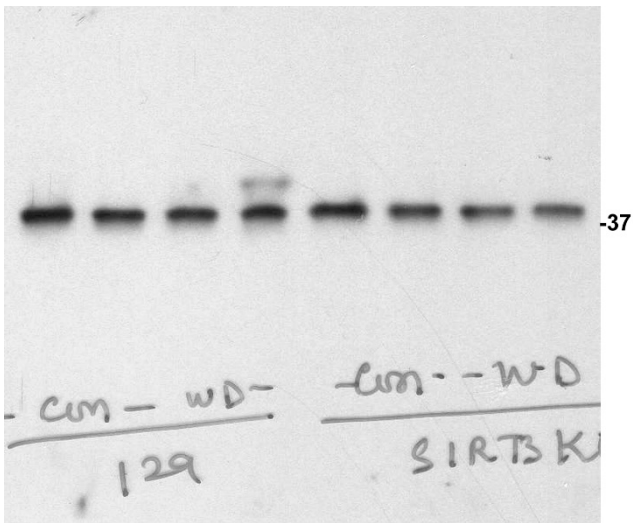

Figure 8d.  $\beta$  actin kDa

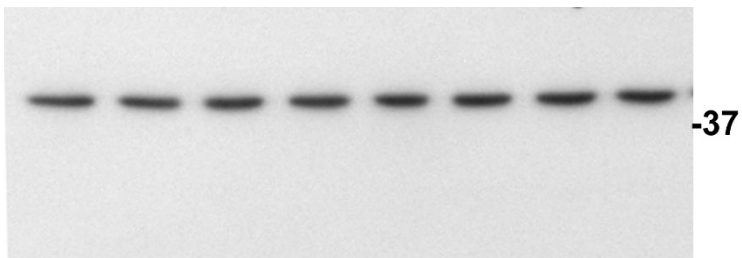

Supplement: 41598_2018_35890_MOESM1_ESM.pdf [file 41598_2018_35890_MOESM1_ESM.pdf]
